# Supplementary material
Source: Frontiers journal article supplement (https://www.frontiersin.org/articles/487716)
Supplement: Data_Sheet_2.pdf [file Data_Sheet_2.pdf]

## SUPPLEMENTARY MATERIAL

**Table S1. List of naturally aged Arabidopsis seeds used in this study.**

| Harvest time | Germination percentage $\pm$ SE |
|--------------|---------------------------------|
| Sep.2014     | 100.0 $\pm$ 0.0                 |
| Mar.2010     | 99.0 $\pm$ 0.0                  |
| Sep.2003     | 97.3 $\pm$ 2.5                  |
| Dec.1999     | 68.3 $\pm$ 0.6                  |
| Dec.1997     | 45.0 $\pm$ 2.0                  |
| Dec.1997     | 10.0 $\pm$ 1.1                  |
| Dec.1997     | 2.0 $\pm$ 0.3                   |
| Dec.1997     | 0.5 $\pm$ 0.5                   |

Arabidopsis seeds were collected from mature plants, placed in 2.0 mL tubes with a screw cap, and stored in a 4°C refrigerator. For germination assay, seeds were sterilized and spot-placed on  $\frac{1}{2}$  MS plates containing 1% sucrose. Each seed lot had at least three plates with each plate having 100 seeds. Plates were placed in a tissue culture chamber, and after 7 days surveyed for seed germination. The germination percentage with standard error (SE) is shown. The germination assay was performed in Mar. 2015.

**Table S2. List of genes used to survey the presence of seed stored mRNAs by RT-PCR.**

| Protein ubiquitination<br>(group A) |           |              | Heat shock proteins<br>(group B) |           |              | Cell cycle and growth<br>(group C) |           |              | Others<br>(group D) |           |              |
|-------------------------------------|-----------|--------------|----------------------------------|-----------|--------------|------------------------------------|-----------|--------------|---------------------|-----------|--------------|
| Gene<br>code                        | Gene ID   | CDS<br>(bps) | Gene<br>code                     | Gene ID   | CDS<br>(bps) | Gene<br>code                       | Gene ID   | CDS<br>(bps) | Gene<br>code        | Gene ID   | CDS<br>(bps) |
| A1                                  | At1g78870 | 441          | B1                               | At4g10250 | 590          | C1                                 | At3g48750 | 885          | D1                  | At3g62060 | 1260         |
| A2                                  | At1g16890 | 489          | B2                               | At5g59720 | 490          | C2                                 | At5g10270 | 1518         | D2                  | At2g46930 | 1251         |
| A3                                  | At1g23260 | 477          | B3                               | At1g59860 | 460          | C3                                 | At1g73690 | 1197         | D3                  | At3g16090 | 1479         |
| A4                                  | At2g36060 | 441          | B4                               | At5g12030 | 461          | C4                                 | At1g44110 | 1383         | D4                  | At5g27150 | 1617         |
| A5                                  | At5g41700 | 450          | B5                               | At4g27670 | 685          | C5                                 | At1g77390 | 1329         | D5                  | At1g15690 | 2313         |
| A6                                  | At5g56150 | 447          | B6                               | At5g02490 | 1962         | C6                                 | At5g43080 | 1068         | D6                  | At2g01980 | 3441         |
| A7                                  | At1g17280 | 714          | B7                               | At1g16030 | 1940         | C7                                 | At2g17620 | 1290         | D7                  | At2g39800 | 2154         |
| A8                                  | At5g62540 | 453          | B8                               | At4g24280 | 2160         | C8                                 | At1g16330 | 1947         | D8                  | At1g28120 | 921          |
| A9                                  | At5g59300 | 612          | B9                               | At2g32120 | 1692         | C9                                 | At1g70210 | 1020         | D9                  | At1g18860 | 1443         |
| A10                                 | At5g05080 | 756          | B10                              | At5g09590 | 2049         | C10                                | At2g22490 | 1089         | D10                 | At1g13930 | 468          |
| A11                                 | At1g36340 | 465          | B11                              | At5g52640 | 2118         | C11                                | At4g34160 | 1131         | D11                 | At2g39730 | 1425         |
| A12                                 | At3g24515 | 1230         | B12                              | At5g56000 | 2100         | C12                                | At5g65420 | 957          | D12                 | At4g20360 | 1431         |
| A13                                 | At5g41340 | 561          | B13                              | At2g04030 | 2343         | C13                                | At4g37630 | 972          | D13                 | At2g30870 | 648          |
| A14                                 | At1g63800 | 558          | B14                              | At3g07770 | 2400         | C14                                | At4g03270 | 909          | D14                 | At3g26650 | 1191         |
| A15                                 | At2g46030 | 552          | B15                              | At4g24190 | 2472         | C15                                | At2g23430 | 576          | D15                 | At3g26650 | 1737         |
| A16                                 | At5g33393 | 1308         | B16                              | At1g74310 | 2736         | C16                                | At3g50630 | 630          | D16                 | At2g43030 | 816          |
| A17                                 | At5g33393 | 837          | B17                              | At5g15450 | 2907         | C17                                | At3g24810 | 570          | D17                 | At5g11670 | 1767         |
| A18                                 | At1g74370 | 786          | B18                              | At2g25140 | 2895         | C18                                | At3g19150 | 591          | D18                 | At1g54870 | 1008         |
| A19                                 | At4g14220 | 1116         | B19                              | At3g48870 | 2859         | C19                                | At1g49620 | 588          | D19                 | At5g03860 | 1689         |
| A20                                 | At3g01650 | 1470         | B20                              | At5g51070 | 2838         | C20                                | At5g48820 | 723          | D20                 | At3g08030 | 1098         |
| A21                                 | At5g14420 | 1407         |                                  |           |              | C21                                | At2g32710 | 870          |                     |           |              |
| A22                                 | At2g42360 | 711          |                                  |           |              | C22                                | At3g12280 | 3042         |                     |           |              |
| A23                                 | At2g47700 | 1077         |                                  |           |              | C23                                | At1g59580 | 1131         |                     |           |              |
| A24                                 | At4g11680 | 1173         |                                  |           |              | C24                                | At1g07370 | 1025         |                     |           |              |
| A25                                 | At5g37270 | 627          |                                  |           |              | C25                                | At2g29570 | 795          |                     |           |              |
| A26                                 | At5g38895 | 981          |                                  |           |              | C26                                | At1g04820 | 1353         |                     |           |              |
| A27                                 | At5g41350 | 639          |                                  |           |              | C27                                | At5g23860 | 1350         |                     |           |              |
| A28                                 | At1g73760 | 1104         |                                  |           |              | C28                                | At3g16640 | 507          |                     |           |              |
| A29                                 | At3g58720 | 801          |                                  |           |              | C29                                | At1g19850 | 2709         |                     |           |              |
| A30                                 | At5g08139 | 1131         |                                  |           |              | C30                                | At1g30330 | 2808         |                     |           |              |
| A31                                 | At1g55530 | 1056         |                                  |           |              | C31                                | At1g59750 | 1998         |                     |           |              |
| A32                                 | At3g20395 | 672          |                                  |           |              | C32                                | At1g19220 | 3261         |                     |           |              |
| A33                                 | At2g17730 | 762          |                                  |           |              |                                    |           |              |                     |           |              |
| A34                                 | At5g73270 | 627          |                                  |           |              |                                    |           |              |                     |           |              |
| A35                                 | At5g47570 | 378          |                                  |           |              |                                    |           |              |                     |           |              |
| A36                                 | At5g05130 | 2589         |                                  |           |              |                                    |           |              |                     |           |              |
| A37                                 | At4g23450 | 627          |                                  |           |              |                                    |           |              |                     |           |              |
| A38                                 | At4g00335 | 573          |                                  |           |              |                                    |           |              |                     |           |              |
| A39                                 | At3g16090 | 1479         |                                  |           |              |                                    |           |              |                     |           |              |
| A40                                 | At1g63170 | 1146         |                                  |           |              |                                    |           |              |                     |           |              |
| A41                                 | At1g12760 | 1227         |                                  |           |              |                                    |           |              |                     |           |              |
| A42                                 | At3g61180 | 1140         |                                  |           |              |                                    |           |              |                     |           |              |
| A43                                 | At1G23030 | 1839         |                                  |           |              |                                    |           |              |                     |           |              |
| A44                                 | At3G46510 | 1983         |                                  |           |              |                                    |           |              |                     |           |              |
| A45                                 | At1G29340 | 2190         |                                  |           |              |                                    |           |              |                     |           |              |
| A46                                 | At2g35930 | 1236         |                                  |           |              |                                    |           |              |                     |           |              |
| A47                                 | At5G67530 | 1788         |                                  |           |              |                                    |           |              |                     |           |              |
| A48                                 | At5G61560 | 2391         |                                  |           |              |                                    |           |              |                     |           |              |

A total of 120 genes were tested and they are loosely grouped into four groups: 48 genes in protein ubiquitination group (group A), 20 genes in heat shock protein group (group B), 32 genes in cell cycle and growth group (group C), and 20 other genes in the last group (group D). For convenience of referring in this study, each gene is given a gene code. The gene ID and the length of cDNA coding sequence (CDS) in basepairs (bps) are indicated.

**Table S3.  $\Delta$ Ct values for 29 genes in qPCR analysis on changes in stored mRNAs in aged seeds.**

| Gene code | Gene ID   | Size (bps) | Average Ct value $\pm$ standard error |                |                | $\Delta$ Ct   |               |
|-----------|-----------|------------|---------------------------------------|----------------|----------------|---------------|---------------|
|           |           |            | Control                               | AA             | NA             | AA            | NA            |
| A18       | At1g74370 | 786        | 20.9 $\pm$ 0.2                        | 22.1 $\pm$ 0.0 | 21.9 $\pm$ 0.1 | 1.1 $\pm$ 0.1 | 0.9 $\pm$ 0.1 |
| A20       | At3g01650 | 1470       | 22.1 $\pm$ 0.1                        | 23.6 $\pm$ 0.1 | 24.2 $\pm$ 0.2 | 1.6 $\pm$ 0.1 | 2.2 $\pm$ 0.2 |
| A21       | At5g14420 | 1407       | 24.1 $\pm$ 0.2                        | 25.6 $\pm$ 0.1 | 24.8 $\pm$ 0.2 | 1.5 $\pm$ 0.1 | 0.7 $\pm$ 0.2 |
| A26       | At5g38895 | 981        | 22.0 $\pm$ 0.1                        | 23.2 $\pm$ 0.6 | 23.8 $\pm$ 0.3 | 1.2 $\pm$ 0.4 | 1.8 $\pm$ 0.1 |
| A27       | At5g41350 | 639        | 21.4 $\pm$ 0.3                        | 22.6 $\pm$ 0.1 | 22.1 $\pm$ 0.2 | 1.2 $\pm$ 0.1 | 0.7 $\pm$ 0.2 |
| A31       | At1g55530 | 1056       | 23.9 $\pm$ 0.1                        | 25.6 $\pm$ 0.3 | 24.8 $\pm$ 0.2 | 1.7 $\pm$ 0.3 | 0.8 $\pm$ 0.2 |
| A33       | At2g17730 | 762        | 27.0 $\pm$ 0.0                        | 28.4 $\pm$ 0.1 | 27.8 $\pm$ 0.1 | 1.4 $\pm$ 0.1 | 0.8 $\pm$ 0.1 |
| A35       | At5g47570 | 1400       | 26.8 $\pm$ 0.1                        | 28.5 $\pm$ 0.1 | 27.9 $\pm$ 0.1 | 1.6 $\pm$ 0.1 | 1.0 $\pm$ 0.1 |
| A38       | At4g00335 | 537        | 25.8 $\pm$ 0.2                        | 26.3 $\pm$ 0.1 | 25.8 $\pm$ 0.2 | 0.6 $\pm$ 0.1 | 0.1 $\pm$ 0.2 |
| A40       | At1g63170 | 1146       | 27.3 $\pm$ 0.1                        | 28.5 $\pm$ 0.1 | 28.0 $\pm$ 0.1 | 1.2 $\pm$ 0.1 | 0.7 $\pm$ 0.1 |
| A41       | At1g12760 | 1227       | 24.2 $\pm$ 0.1                        | 26.8 $\pm$ 0.2 | 25.6 $\pm$ 0.2 | 2.6 $\pm$ 0.2 | 1.4 $\pm$ 0.2 |
| A42       | At3g61180 | 1140       | 26.0 $\pm$ 0.0                        | 27.8 $\pm$ 0.2 | 26.9 $\pm$ 0.2 | 1.8 $\pm$ 0.2 | 0.9 $\pm$ 0.2 |
| A44       | At3G46510 | 1983       | 26.2 $\pm$ 0.0                        | 27.4 $\pm$ 0.3 | 28.1 $\pm$ 0.1 | 1.3 $\pm$ 0.3 | 1.9 $\pm$ 0.1 |
| A45       | At1g29340 | 2190       | 25.1 $\pm$ 0.2                        | 27.3 $\pm$ 0.1 | 27.5 $\pm$ 0.1 | 2.2 $\pm$ 0.1 | 2.4 $\pm$ 0.1 |
| A47       | At5G67530 | 1788       | 28.2 $\pm$ 0.3                        | 31.5 $\pm$ 0.2 | 29.7 $\pm$ 0.1 | 3.3 $\pm$ 0.2 | 1.5 $\pm$ 0.1 |
| B1        | At4g10250 | 590        | 24.5 $\pm$ 0.3                        | 25.4 $\pm$ 0.1 | 25.4 $\pm$ 0.1 | 0.9 $\pm$ 0.1 | 0.9 $\pm$ 0.1 |
| B2        | At5g59720 | 490        | 27.9 $\pm$ 0.5                        | 28.5 $\pm$ 0.5 | 28.4 $\pm$ 0.1 | 0.5 $\pm$ 0.5 | 0.5 $\pm$ 0.1 |
| B4        | At5g12030 | 461        | 15.6 $\pm$ 0.0                        | 16.3 $\pm$ 0.0 | 15.9 $\pm$ 0.1 | 0.7 $\pm$ 0.0 | 0.4 $\pm$ 0.1 |
| B5        | At4g27670 | 685        | 28.3 $\pm$ 0.3                        | 28.8 $\pm$ 0.0 | 27.3 $\pm$ 0.1 | 0.5 $\pm$ 0.0 | 0.9 $\pm$ 0.1 |
| B7        | At1g16030 | 1940       | 18.8 $\pm$ 0.2                        | 23.5 $\pm$ 0.2 | 22.7 $\pm$ 0.2 | 4.7 $\pm$ 0.2 | 3.9 $\pm$ 0.2 |
| B9        | At2g32120 | 1692       | 22.1 $\pm$ 0.1                        | 25.6 $\pm$ 0.1 | 24.5 $\pm$ 0.2 | 3.5 $\pm$ 0.1 | 2.3 $\pm$ 0.2 |
| B10       | At5g09590 | 2049       | 24.9 $\pm$ 0.2                        | 29.2 $\pm$ 0.1 | 28.0 $\pm$ 0.1 | 4.2 $\pm$ 0.0 | 3.1 $\pm$ 0.1 |
| B12       | At5g56000 | 2100       | 26.8 $\pm$ 0.2                        | 30.6 $\pm$ 0.5 | 29.7 $\pm$ 0.2 | 3.8 $\pm$ 0.5 | 2.9 $\pm$ 0.2 |
| B13       | At2g04030 | 2343       | 26.6 $\pm$ 0.3                        | 31.4 $\pm$ 0.2 | 30.4 $\pm$ 0.3 | 4.8 $\pm$ 0.2 | 3.8 $\pm$ 0.3 |
| B14       | At3g07770 | 2400       | 28.8 $\pm$ 0.2                        | 31.5 $\pm$ 0.1 | 31.9 $\pm$ 0.4 | 2.6 $\pm$ 0.1 | 3.1 $\pm$ 0.4 |
| B16       | At1g74310 | 2736       | 23.2 $\pm$ 0.3                        | 29.9 $\pm$ 0.1 | 25.8 $\pm$ 0.2 | 6.7 $\pm$ 0.2 | 2.5 $\pm$ 0.1 |
| B17       | At5g15450 | 2907       | 29.5 $\pm$ 0.1                        | 32.8 $\pm$ 0.2 | 32.2 $\pm$ 0.1 | 3.3 $\pm$ 0.2 | 2.7 $\pm$ 0.1 |
| B20       | At5g51070 | 2838       | 25.3 $\pm$ 0.3                        | 32.2 $\pm$ 0.2 | 31.0 $\pm$ 0.1 | 6.9 $\pm$ 0.2 | 5.8 $\pm$ 0.4 |
| D5        | At1g15690 | 2313       | 23.7 $\pm$ 0.2                        | 28.4 $\pm$ 0.3 | 27.4 $\pm$ 0.2 | 4.7 $\pm$ 0.3 | 3.7 $\pm$ 0.2 |

cDNAs of control (100% germination), artificially aged (AA, 0.5% germination) and naturally aged (NA, 0.5% germination) Arabidopsis seeds were used. All Ct values are the average of three biological repeats. For each gene analyzed, the  $\Delta$ Ct = Ct of aged sample – Ct of control.

**Table S4. List of cDNA fragments of six genes and the primers used in qPCR analysis.**

| Fragment code       | Fragment Length (bps) | Forward primer          | Reverse primer           |
|---------------------|-----------------------|-------------------------|--------------------------|
| B16 <sub>250</sub>  | 250                   | AGAACTGTCAAAGATGGTTGTG  | TTAATCCTCGATCATTTCCTCA   |
| B16 <sub>500</sub>  | 500                   | AGGTGAGGAAACACTTCAGAC   | TTAATCCTCGATCATTTCCTCA   |
| B16 <sub>1000</sub> | 1000                  | TGCAGTTTCTGAGGCAATTCT   | TTAATCCTCGATCATTTCCTCA   |
| B16 <sub>1500</sub> | 1500                  | ATTGATAACCTTGAAAGGAAGAG | TTAATCCTCGATCATTTCCTCA   |
| B16 <sub>2000</sub> | 2000                  | TAGTTGCTGGTGCTAAATACC   | TTAATCCTCGATCATTTCCTCA   |
| B16 <sub>2500</sub> | 2500                  | ACCTGATGATATTCCAGCGAG   | TTAATCCTCGATCATTTCCTCA   |
| B20 <sub>250</sub>  | 250                   | TTTAGAGGTGTCTGAACCCGT   | CTATGCGATCGATGTTTTGTC    |
| B20 <sub>500</sub>  | 500                   | GATCATTGGCCATTGCAAAGG   | CTATGCGATCGATGTTTTGTC    |
| B20 <sub>1000</sub> | 1000                  | TGAAAGAATGCTTCTTATGAGTC | CTATGCGATCGATGTTTTGTC    |
| B20 <sub>1500</sub> | 1500                  | TTTCAGCCAGTGTTGATTAACG  | CTATGCGATCGATGTTTTGTC    |
| B20 <sub>2000</sub> | 2000                  | CACGTGCTAGTGAGGGTCTT    | CTATGCGATCGATGTTTTGTC    |
| B14 <sub>2000</sub> | 2000                  | ATAAGCTTCGTTATTTGAGCGT  | TCATTTCTTCCCATCCACTTC    |
| C22 <sub>2000</sub> | 2000                  | ATAGCTTACTTGATCTGGAAG   | CTATGAATCTGTTGGCTCGG     |
| B10 <sub>2000</sub> | 2000                  | CCTCTCCTTTCTCAGCTTAC    | TCACTTTTTTCACTTCCTCGTACT |
| D5 <sub>2000</sub>  | 2000                  | GAAAAGGATACCACCGTGAGT   | GTGTCTTCATGATTTTCTTTGC   |

The fragment length (in basepairs, bps) starts from the STOP codon counting towards the 5'-direction of a stored mRNA. Primer sequences are listed from the 5' end to 3' end.

**Table S5. The 25S/18S ratios and RNA integrity numbers (RINs) of RNA sample isolated from control and aged Arabidopsis seeds.**

| Germination<br>Percentage (%) |          | NA   |      |      |      |      |      |      | AA   |      |      |      |      |      |
|-------------------------------|----------|------|------|------|------|------|------|------|------|------|------|------|------|------|
|                               |          | 100  | 99.0 | 87.3 | 68.3 | 46.3 | 10   | 0    | 100  | 92.7 | 52.0 | 20.7 | 3.7  | 0    |
| 25S/18S                       | Repeat 1 | 1.73 | 1.75 | 1.68 | 1.58 | 2.63 | 1.85 | 1.66 | 1.81 | 1.62 | 1.83 | 2.14 | 1.63 | 1.79 |
|                               | Repeat 2 | 1.67 | 1.71 | 1.5  | 1.25 | 2.05 | 1.5  | 2.08 | 1.54 | 1.7  | 1.74 | 1.45 | 1.78 | 1.91 |
| RIN                           | Repeat 1 | 8.3  | 8.8  | 8.5  | 8.5  | 8.4  | 8.8  | 7.2  | 9.4  | 8.5  | 8.5  | 8.6  | 8.6  | 8.7  |
|                               | Repeat 2 | 8.3  | 9.2  | 8.2  | 8    | 8.4  | 8    | 8.2  | 8.2  | 8.3  | 8.3  | 8.1  | 8.6  | 8.8  |

Total RNAs were isolated from naturally aged (NA) and artificially aged (AA) as well as unaged control Arabidopsis seeds. For each aging point, two samples were used for RNA analysis by Agilent 2100 Bioanalyzer to obtain the 25S/18S ratio and RIN.

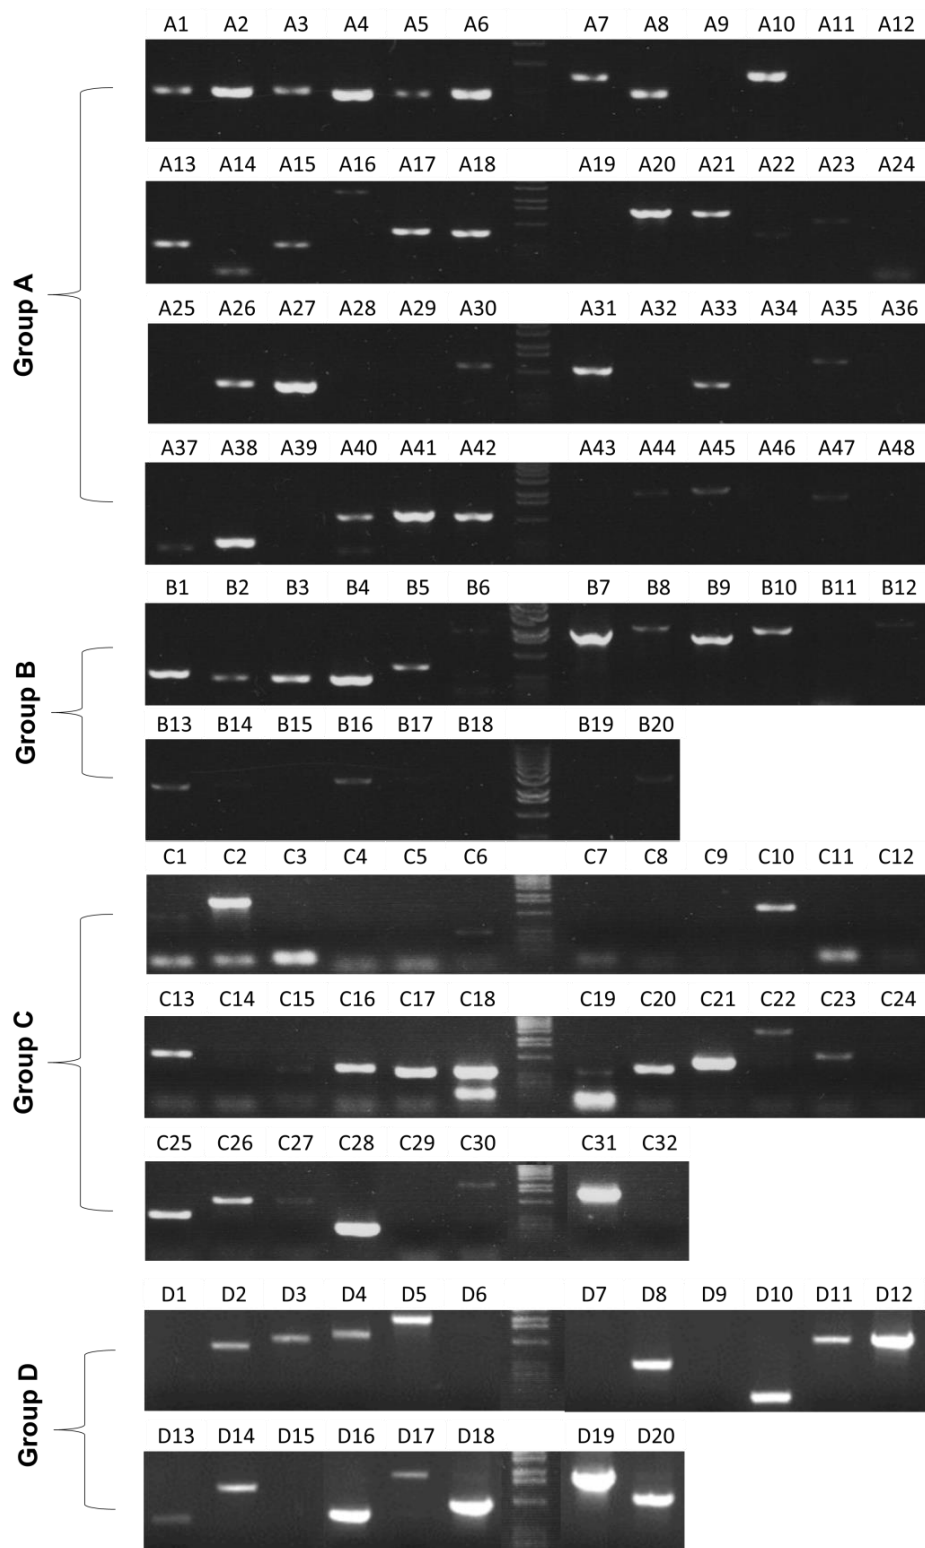

**Figure S1. Results of RT-PCR analysis of 120 genes (in A, B, C and D groups) to survey the presence of stored mRNAs in Arabidopsis dry seeds.** Information on these genes is provided in Table S2. cDNA reverse-transcribed from total RNA of unaged dry seeds was used in PCR with primers specific for each of the genes. The PCR products were subjected to electrophoresis in 1% agarose gel.

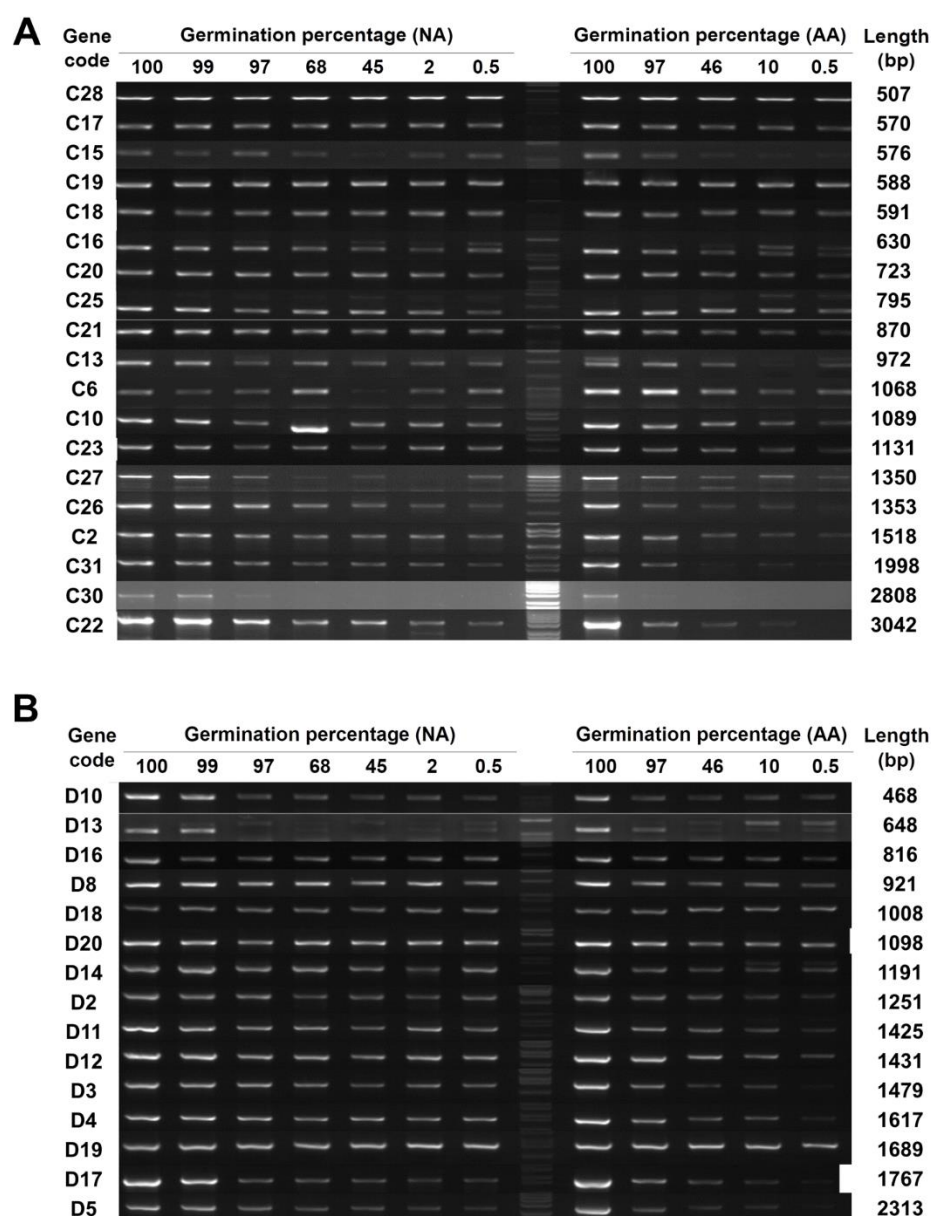

**Figure S2. The level of stored mRNAs in naturally aged (NA) and artificially aged (AA) *Arabidopsis* seeds detected by RT-PCR.** cDNAs from NA and AA seeds with different percentages of germination as well as unaged control seeds (100% germination) were used. Different genes in two groups were analyzed. The number of PCR cycles varied depending on their mRNA abundance in the unaged seeds. PCR products were run in agarose gels. (a) Analysis of 19 genes in group C (for list of genes, see Table S2). (b) Analysis of 15 genes in group D. The germination percentage of a seed sample is indicated above the DNA lane. The gene code is indicated at the left and the length of cDNA amplified by PCR indicated at the right of each row.

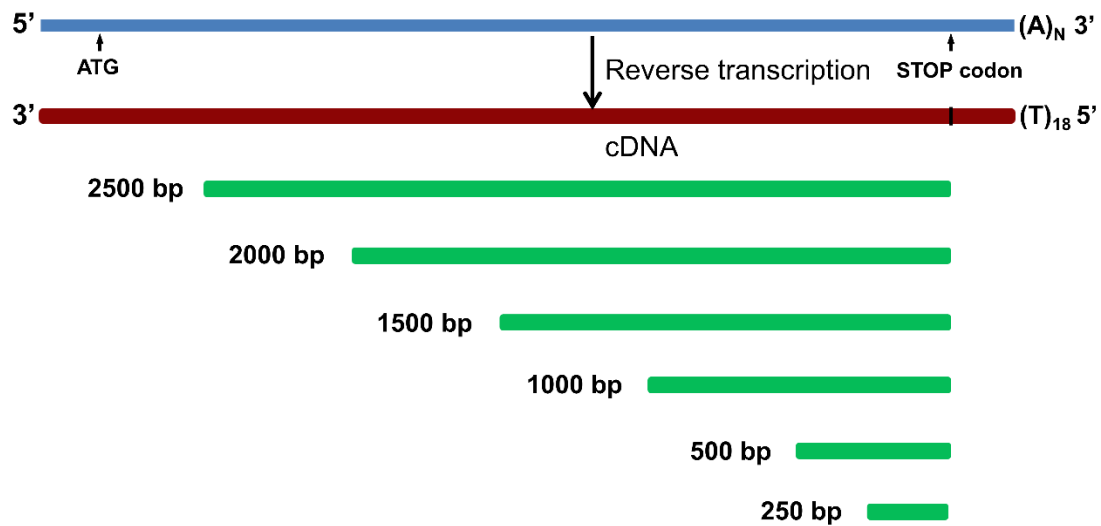

**Figure S3. Drawing to show the positions of different fragments on the cDNA derived from a stored mRNA.** First-strand cDNAs are synthesized from stored mRNAs with an oligo(dT)<sub>18</sub> primer. Fragments of different lengths start from the STOP codon and extend towards the 5'-direction of a stored mRNA.



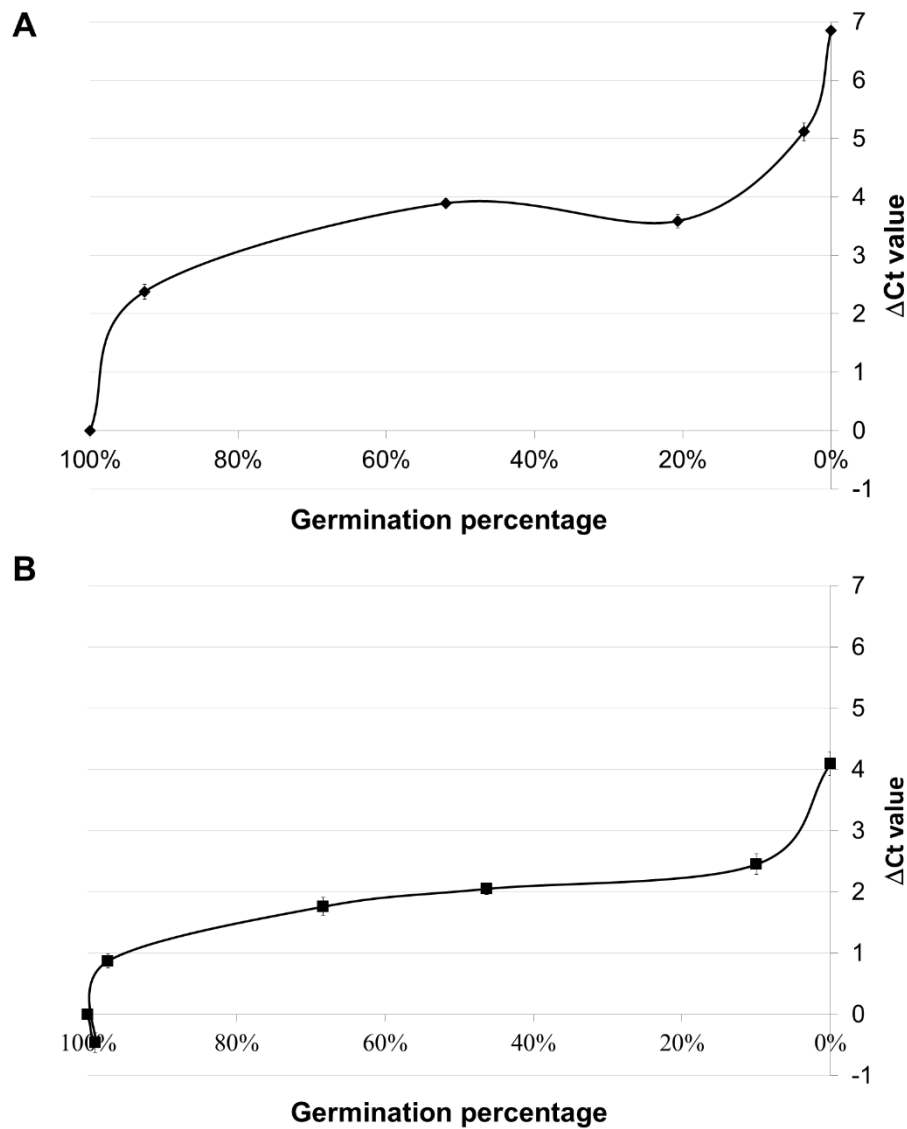

**Figure S4. Relationship between  $\Delta Ct$  for the cDNA (2500bp fragment) of gene B16 and *Arabidopsis* seed germination percentage.** cDNAs from naturally aged (NA) and artificially aged (AA) seed samples with different percentages of germination were used. **(a)** Relationship between the  $\Delta Ct$  value and germination percentage of six AA samples (with the germination percentage being: 100%, 92.7%, 52%, 20.7%, 3.7% and 0%). **(b)** Relationship between the  $\Delta Ct$  value and germination percentage of five NA samples (with the germination percentage being: 100%, 99%, 97.3%, 68.3%, 46.3% 10% and 0%).

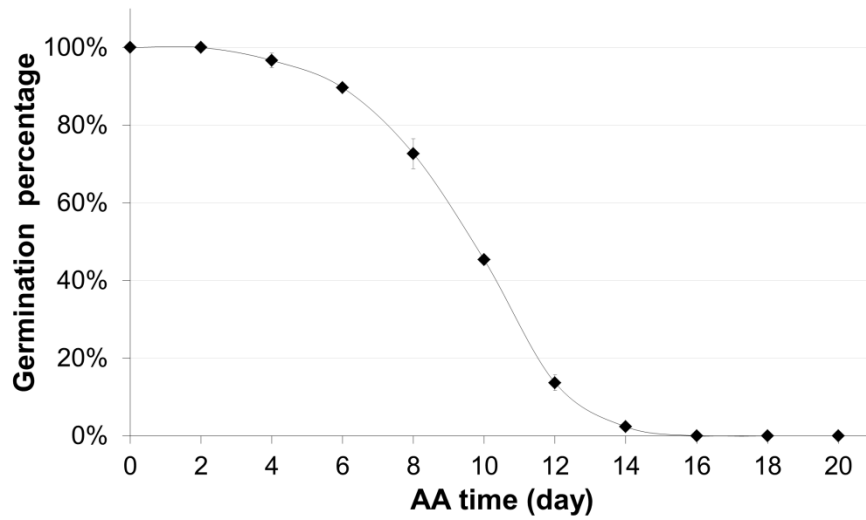

**Figure S5. Change in the percentage of germination for Arabidopsis seeds following the artificial aging treatment.** Unaged seeds were treated with artificial aging conditions for the indicated times. They were sterilized and then plated on  $\frac{1}{2}$  MS plates. The percentage of seeds germinated was obtained after 7 days of incubation.
